# Supplementary material for: Contact angle measurement of free-standing square-millimeter single-layer graphene
Source: PubMed Central journal article supplement (PMC6180012; doi:10.1038/s41467-018-06608-0), 2018-10-10
Supplement: 41467_2018_6608_MOESM1_ESM.pdf [file 41467_2018_6608_MOESM1_ESM.pdf]

SUPPLEMENTARY INFORMATION

**Contact angle measurement of freestanding square millimeters of single  
layer graphene**

Anna V. Prydatko†, Liubov A. Belyaeva†, Lin Jiang, Lia M.C. Lima and Grégory F. Schneider\*

*Leiden University, Faculty of Science, Leiden Institute of Chemistry, Einsteinweg 55, 2333CC*

*Leiden, The Netherlands*

†These authors contributed equally to this work.

\* to whom correspondence should be addressed: [g.f.schneider@chem.leidenuniv.nl](mailto:g.f.schneider@chem.leidenuniv.nl)

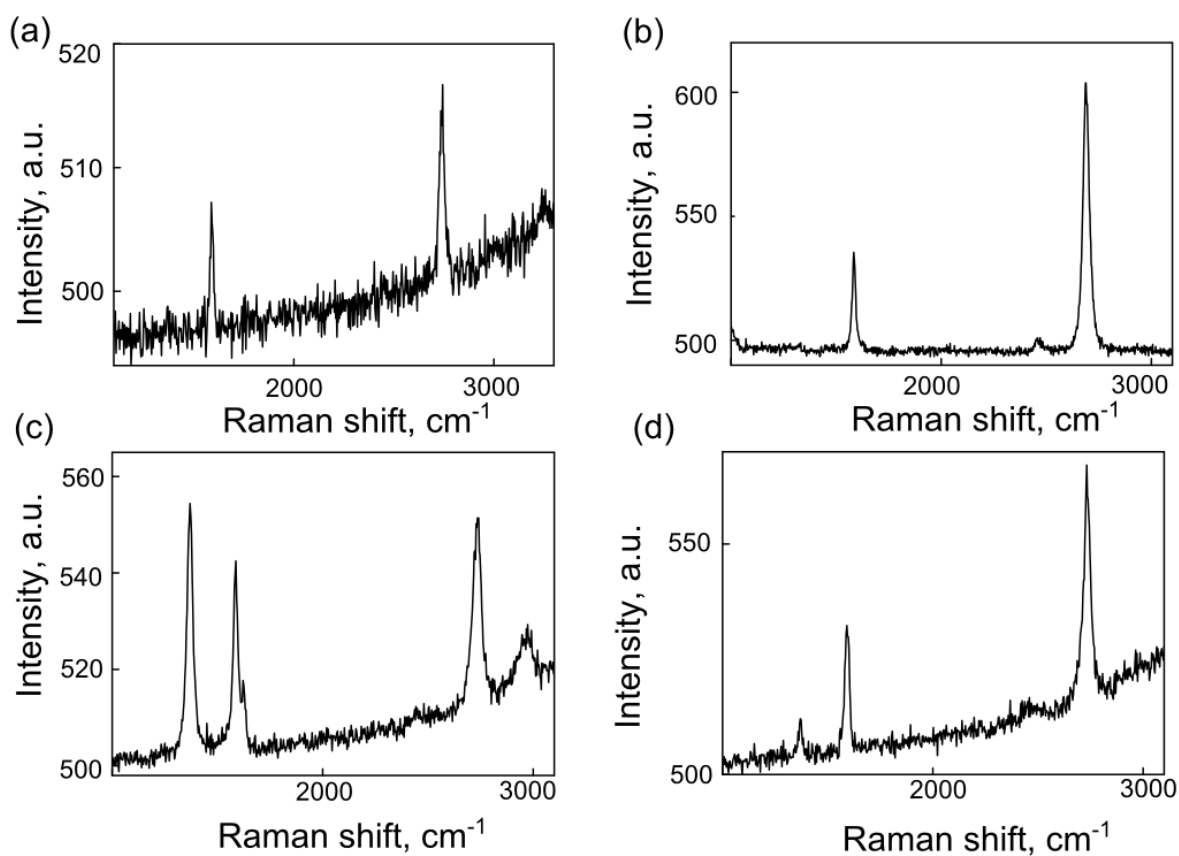

**Supplementary Figure 1.** Raman spectra of CVD (chemical vapor deposition) graphene before and after plasma modification. (a) Non-treated graphene on Cu after the growth. (b) Non-treated graphene transferred onto a Si/SiO<sub>2</sub> wafer. (c) Graphene on Cu after H<sub>2</sub> plasma treatment. (d) Graphene on Cu after O<sub>2</sub> plasma treatment.

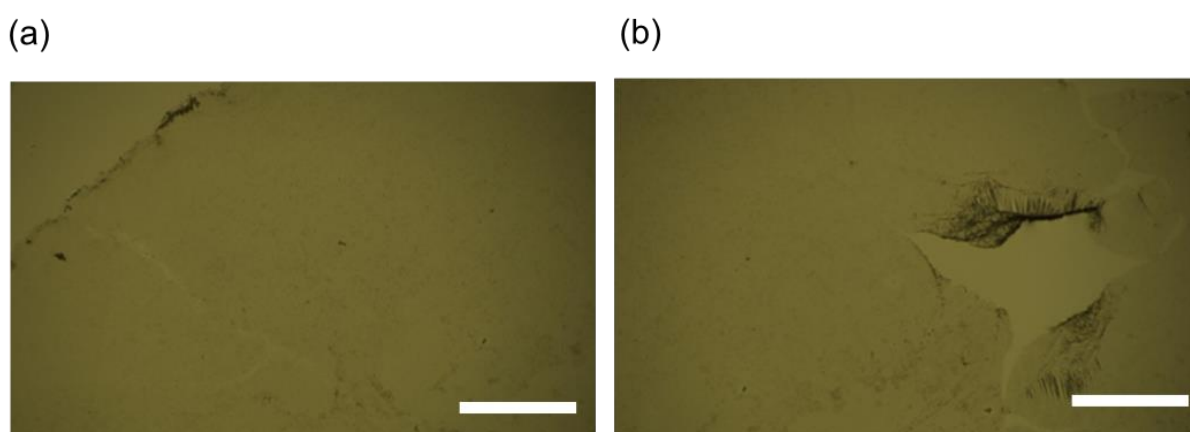

**Supplementary Figure 2.** Optical images of graphene floating on the surface of water. (a) Before captive bubble measurement. The scale bar represents 500  $\mu\text{m}$ . (b) After captive bubble measurement. The scale bar represents 500  $\mu\text{m}$ .

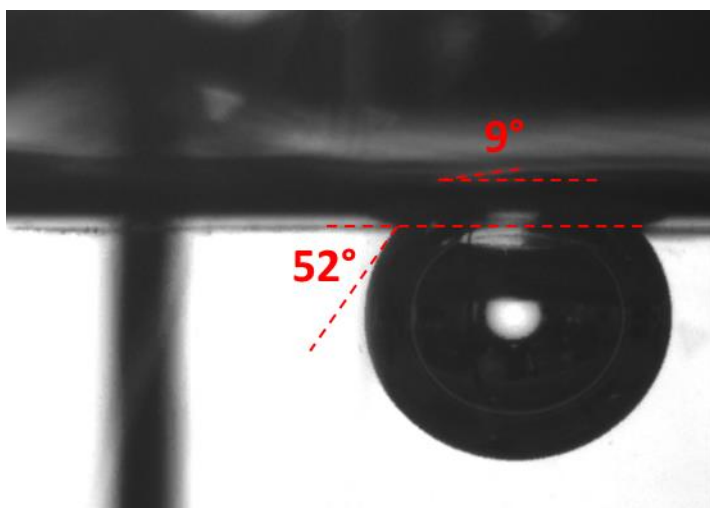

**Supplementary Figure 3.** Contact angle of graphene on the surface of 0.1 M aqueous solution of  $\text{FeCl}_3$ . Presence of ions in concentrations below 0.3 M does not affect the measured contact angle, the contact angles of graphene in different etchant solutions are equal to the contact angle of graphene in pure water.

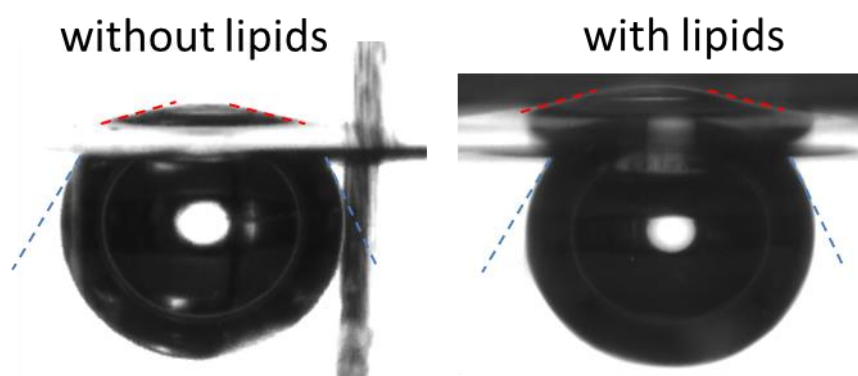

**Supplementary Figure 4.** Captive bubble on graphene with (right) and without (left) a DPPC (1,2-dipalmitoyl-sn-glycero-3-phosphocholine) lipid scaffold. Lipids do not affect the contact angle value of  $42^\circ \pm 3^\circ$ .

### Supplementary Note 1

#### Calculation of surface free energy

Surface energies of bare PMMA (poly(methyl methacrylate)) and PMMA-coated graphene samples were calculated according the Owens-Wendt model<sup>1</sup>. Based on the contact angle measurements with

liquids of different polarities, the Owens-Wendt equation allows for the determination of total surface energy of a solid and its polar and dispersive components:

$$\gamma_{lv}(1 + \cos \theta) = 2(\sqrt{\gamma_s^d \gamma_l^d} + \sqrt{\gamma_s^p \gamma_l^p})$$

The polar and dispersive components of liquids  $\gamma_L^P$  and  $\gamma_L^D$  were determined by measuring contact angles (sessile drop method) and applying the Owens/Wendt Theory for PTFE (teflon), which is a solid with known polar and dispersive components of the surface tension ( $\gamma_s^P=0 \text{ mN m}^{-1}$ ,  $\gamma_s^D=18 \text{ mN m}^{-1}$ ). The determined surface tensions and their components of all used liquids are listed in Table 1.

Then contact angles of bare and PMMA-coated graphene with the liquids listed in Table 1 were

measured. The results were plotted as  $\frac{\gamma_L(\cos\theta+1)}{2\sqrt{\gamma_L^D}}$  versus  $\frac{\sqrt{\gamma_L^P}}{\sqrt{\gamma_L^D}}$  for each substrate and the dependences

were fitted linearly. The slope of the plot equals  $\sqrt{\gamma_S^P}$  and the intercept equals  $\sqrt{\gamma_S^D}$ . The squares of the latter two equal  $\gamma_S^P$  and  $\gamma_S^D$  respectively. The resulting surface tensions and their polar and dispersive components are presented in Supplementary Table 2 below and charted in Figure 1c of the main text.

**Supplementary Table 1.** Calculated surface tensions, polar and dispersive components of tested liquids

| Liquid               | $\gamma_L^P$ , mJ m <sup>-2</sup> | $\gamma_L^D$ , mJ m <sup>-2</sup> | $\gamma_L^{\text{total}}$ , mJ m <sup>-2</sup> |
|----------------------|-----------------------------------|-----------------------------------|------------------------------------------------|
| Water                | 51                                | 21.8                              | 72.8 ± 2.4                                     |
| Ethylene glycol      | 19.2                              | 28.8                              | 48.0 ± 1.9                                     |
| 10% Ethanol in water | 36.1                              | 23.9                              | 60.0 ± 2.2                                     |
| Diiodomethane        | 0                                 | 50.8                              | 50.8 ± 2.3                                     |
| 1-Methylnaphthalene  | 0                                 | 42.0                              | 42.0 ± 1.1                                     |

**Supplementary Table 2.** Calculated surface tensions, polar and dispersive components of PMMA, freshly PMMA-coated graphene and PMMA-coated graphene aged for six days

| Surface energy/Sample                          | PMMA     | Graphene on PMMA | Graphene on PMMA after 6 days |
|------------------------------------------------|----------|------------------|-------------------------------|
| $\gamma_s^P$ , mN m <sup>-1</sup>              | 9.8±1.6  | 10.8±1.5         | 9.1±1.4                       |
| $\gamma_s^D$ , mN m <sup>-1</sup>              | 41.9±1.3 | 39.1±2.1         | 30.6±2.4                      |
| $\gamma_D^{\text{total}}$ , mN m <sup>-1</sup> | 51.6±2.3 | 47.9±1.6         | 39.7±1.5                      |

### Supplementary References

- Owens, D. K. & Wendt, R. C. Estimation of the surface free energy of polymers. *J. Appl. Polym. Sci.* **13**, 1741–1747 (1969).
