# Supplementary material for: Contact angle measurement of free-standing square-millimeter single-layer graphene
Source: PubMed Central journal article supplement (PMC6180012; doi:10.1038/s41467-018-06608-0), 2018-10-10
Supplement: 41467_2018_6608_MOESM2_ESM.pdf [file 41467_2018_6608_MOESM2_ESM.pdf]

## **Description of Additional Supplementary Files**

File Name: Supplementary Movie 1

Description: Recording of an air bubble underneath graphene without lipids.

File Name: Supplementary Movie 2

Description: Recording of an air bubble underneath graphene surrounded with lipids.

File Name: Supplementary Movie 3

Description: Instability of graphene if not stabilized with lipids: an air bubble moves the graphene away from the camera field of view.
